# Supplementary material for: Effects of water, sanitation, handwashing and nutritional interventions on soil-transmitted helminth infections in young children: A cluster-randomized controlled trial in rural Bangladesh
Source: PubMed Central journal article supplement (PMC6519840; doi:10.1371/journal.pntd.0007323), 2019-05-03
Supplement: pntd.0007323.s003.pdf [file pntd.0007323.s003.pdf]

### Text S3. CONSORT checklist

| Item                      | Description                                                                                                                                                                                                                          | Reported in Section                         |
|---------------------------|--------------------------------------------------------------------------------------------------------------------------------------------------------------------------------------------------------------------------------------|---------------------------------------------|
| <b>Title and Abstract</b> |                                                                                                                                                                                                                                      |                                             |
| 1a                        | Identification as a randomized trial in the title;<br>Identification as a cluster randomized trial in the title                                                                                                                      | Abstract                                    |
| 1b                        | Structured summary of trial design, methods, results, and conclusions                                                                                                                                                                | Abstract                                    |
| <b>Introduction</b>       |                                                                                                                                                                                                                                      |                                             |
| Background and Objectives |                                                                                                                                                                                                                                      |                                             |
| 2a                        | Scientific background and explanation of rationale;<br>Rationale for using a cluster design                                                                                                                                          | Introduction                                |
| 2b                        | Specific objectives or hypotheses; Whether objectives pertain to the cluster level, the individual participant level, or both                                                                                                        | Introduction                                |
| <b>Methods</b>            |                                                                                                                                                                                                                                      |                                             |
| Trial Design              |                                                                                                                                                                                                                                      |                                             |
| 3a                        | Description of trial design (such as parallel, factorial) including allocation ratio; Definition of cluster and description of how the design features apply to the clusters                                                         | Methods (Randomization and masking section) |
| 3b                        | Important changes to methods after trial commencement (such as eligibility criteria), with reasons                                                                                                                                   | N/A                                         |
| Participants              |                                                                                                                                                                                                                                      |                                             |
| 4a                        | Eligibility criteria for participants; Eligibility criteria for clusters                                                                                                                                                             | Methods (Randomization and masking section) |
| 4b                        | Settings and locations where the data were collected                                                                                                                                                                                 | Methods (Study setting section)             |
| Interventions             |                                                                                                                                                                                                                                      |                                             |
| 5                         | The interventions for each group with sufficient details to allow replication, including how and when they were actually administered; Whether interventions pertain to the cluster level, the individual participant level, or both | Methods (Interventions section)             |
| Outcomes                  |                                                                                                                                                                                                                                      |                                             |
| 6a                        | Completely defined pre-specified primary and secondary outcome measures, including how and when they were assessed; Whether outcome measures pertain to the cluster level, the individual participant level, or both                 | Methods (Outcome assessment section)        |

| <b>Item</b>                             | <b>Description</b>                                                                                                                                                                                                                                                                                                                                                                       | <b>Reported in Section</b>                  |
|-----------------------------------------|------------------------------------------------------------------------------------------------------------------------------------------------------------------------------------------------------------------------------------------------------------------------------------------------------------------------------------------------------------------------------------------|---------------------------------------------|
| 6b                                      | Any changes to trial outcomes after the trial commenced, with reasons                                                                                                                                                                                                                                                                                                                    | N/A                                         |
| <b>Sample Size</b>                      |                                                                                                                                                                                                                                                                                                                                                                                          |                                             |
| 7a                                      | How sample size was determined; Method of calculation, number of cluster(s) (and whether equal or unequal cluster sizes are assumed), cluster size, a coefficient of intracluster correlation (ICC or k), and an indication of its uncertainty                                                                                                                                           | Methods (Statistical analysis section)      |
| 7b                                      | When applicable, explanation of any interim analyses and stopping guidelines                                                                                                                                                                                                                                                                                                             | N/A                                         |
| <b>Randomization</b>                    |                                                                                                                                                                                                                                                                                                                                                                                          |                                             |
| <b>Sequence Generation</b>              |                                                                                                                                                                                                                                                                                                                                                                                          |                                             |
| 8a                                      | Method used to generate the random allocation sequence                                                                                                                                                                                                                                                                                                                                   | Methods (Randomization and masking section) |
| 8b                                      | Type of randomization; details of any restriction (such as blocking and block size); Details of stratification or matching if used                                                                                                                                                                                                                                                       | Methods (Randomization and masking section) |
| <b>Allocation Concealment Mechanism</b> |                                                                                                                                                                                                                                                                                                                                                                                          |                                             |
| 9                                       | Mechanism used to implement the random allocation sequence (such as sequentially numbered containers), describing any steps taken to conceal the sequence until interventions were assigned; Specification that allocation was based on clusters rather than individuals and whether allocation concealment (if any) was at the cluster level, the individual participant level, or both | Methods (Randomization and masking section) |
| <b>Implementation</b>                   |                                                                                                                                                                                                                                                                                                                                                                                          |                                             |
| 10a                                     | Who generated the random allocation sequence, who enrolled clusters, and who assigned clusters to interventions                                                                                                                                                                                                                                                                          | Methods (Randomization and masking section) |
| 10b                                     | Mechanism by which individual participants were included in clusters for the purposes of the trial (such as complete enumeration, random sampling)                                                                                                                                                                                                                                       | Methods (Randomization and masking section) |
| 10c                                     | From whom consent was sought (representatives of the cluster, or individual cluster members, or both) and whether consent was sought before or after randomization                                                                                                                                                                                                                       | Methods (Ethics section)                    |
| <b>Blinding</b>                         |                                                                                                                                                                                                                                                                                                                                                                                          |                                             |
| 11a                                     | If done, who was blinded after assignment to interventions (for example, participants, care providers, those assessing outcomes) and how                                                                                                                                                                                                                                                 | Methods (Randomization and masking section) |

| <b>Item</b>                    | <b>Description</b>                                                                                                                                                                                                                                                                              | <b>Reported in Section</b>                                                                                 |
|--------------------------------|-------------------------------------------------------------------------------------------------------------------------------------------------------------------------------------------------------------------------------------------------------------------------------------------------|------------------------------------------------------------------------------------------------------------|
| 11b                            | If relevant, description of the similarity of interventions                                                                                                                                                                                                                                     | N/A                                                                                                        |
| <b>Statistical Methods</b>     |                                                                                                                                                                                                                                                                                                 |                                                                                                            |
| 12a                            | Statistical methods used to compare groups for primary and secondary outcomes; How clustering was taken into account                                                                                                                                                                            | Methods (Statistical analysis section)                                                                     |
| 12b                            | Methods for additional analyses, such as subgroup analyses and adjusted analyses                                                                                                                                                                                                                | Methods (Statistical analyses section)                                                                     |
| <b>Results</b>                 |                                                                                                                                                                                                                                                                                                 |                                                                                                            |
| <b>Participant Flow</b>        |                                                                                                                                                                                                                                                                                                 |                                                                                                            |
| 13a                            | For each group, the numbers of participants/clusters who were randomly assigned, received intended treatment, and were analyzed for the primary outcome                                                                                                                                         | Results (Enrollment section), Figure 1 (CONSORT diagram)                                                   |
| 13b                            | For each group, losses and exclusions after randomization, together with reasons, for both clusters and individual cluster members                                                                                                                                                              | Results (Enrollment section), Figure 1 (CONSORT diagram)                                                   |
| <b>Recruitment</b>             |                                                                                                                                                                                                                                                                                                 |                                                                                                            |
| 14a                            | Dates defining the periods of recruitment and follow-up                                                                                                                                                                                                                                         | Results (Enrollment section)                                                                               |
| 14b                            | Why the trial ended or was stopped                                                                                                                                                                                                                                                              | N/A                                                                                                        |
| <b>Baseline Data</b>           |                                                                                                                                                                                                                                                                                                 |                                                                                                            |
| 15                             | A table showing baseline demographic and clinical characteristics for each group; Baseline characteristics for the individual and cluster levels as applicable for each group                                                                                                                   | Table 1                                                                                                    |
| <b>Numbers Analysed</b>        |                                                                                                                                                                                                                                                                                                 |                                                                                                            |
| 16                             | For each group, number of participants/clusters (denominator) included in each analysis and whether the analysis was by the original assigned groups                                                                                                                                            | Methods (Statistical analyses section), Figure 3, Figure 4                                                 |
| <b>Outcomes and Estimation</b> |                                                                                                                                                                                                                                                                                                 |                                                                                                            |
| 17a                            | For each primary and secondary outcome, results for each group, and the estimated effect size and its precision (such as 95% confidence interval); Results at the individual and cluster levels as applicable and a coefficient of intracluster correlation (ICC or k) for each primary outcome | Results (Interventions vs. control section, Combined vs. single interventions section), Figure 3, Figure 4 |
| 17b                            | For binary outcome, presentation of both absolute and relative effect sizes is recommended                                                                                                                                                                                                      | Results (Interventions vs. control section, Combined vs. single interventions section), Figure 3, Figure 4 |

| <b>Item</b>               | <b>Description</b>                                                                                                                                   | <b>Reported in Section</b>                                 |
|---------------------------|------------------------------------------------------------------------------------------------------------------------------------------------------|------------------------------------------------------------|
| <b>Ancillary Analyses</b> |                                                                                                                                                      |                                                            |
| 18                        | Results of any other analyses performed, including subgroup analyses and adjusted analyses, distinguishing pre-specified from exploratory            | Results (Other effects section, Subgroup analyses section) |
| <b>Harms</b>              |                                                                                                                                                      |                                                            |
| 19                        | All important harms or unintended effects in each group                                                                                              | N/A                                                        |
| <b>Discussion</b>         |                                                                                                                                                      |                                                            |
| <b>Limitations</b>        |                                                                                                                                                      |                                                            |
| 20                        | Trial limitations, addressing sources of potential bias, imprecision and, if relevant, multiplicity of analyses                                      | Discussion (Limitations section)                           |
| <b>Generalisability</b>   |                                                                                                                                                      |                                                            |
| 21                        | Generalisability (external validity, applicability) of the trial findings; Generalisability to clusters and/or individual participants (as relevant) | Discussion (Limitations section)                           |
| <b>Interpretation</b>     |                                                                                                                                                      |                                                            |
| 22                        | Interpretation consistent with results, balancing benefits and harms, and considering other relevant evidence                                        | Discussion                                                 |
| <b>Other Information</b>  |                                                                                                                                                      |                                                            |
| <b>Registration</b>       |                                                                                                                                                      |                                                            |
| 23                        | Registration number and name of trial registry                                                                                                       | Methods (Registration section)                             |
| <b>Protocol</b>           |                                                                                                                                                      |                                                            |
| 24                        | Where the full trial protocol can be accessed, if available                                                                                          | Methods (Registration section)                             |
| <b>Funding</b>            |                                                                                                                                                      |                                                            |
| 25                        | Sources of funding and other support (such as supply of drugs), role of funders                                                                      | Acknowledgements                                           |
