# Supplementary material for: Effects of water, sanitation, handwashing and nutritional interventions on soil-transmitted helminth infections in young children: A cluster-randomized controlled trial in rural Bangladesh
Source: PubMed Central journal article supplement (PMC6519840; doi:10.1371/journal.pntd.0007323), 2019-05-03
Supplement: pntd.0007323.s006.pdf [file pntd.0007323.s006.pdf]

## Text S6. Bias in effect estimates with imperfect sensitivity and specificity under non-differential classification

### Definitions:

P1 True probability of disease in intervention group

P0 True probability of disease in control group

P1\* Measured probability of disease in intervention group

P0\* Measured probability of disease in control group

PR True prevalence ratio between intervention vs. control ( $P1/P0$ )

PD True prevalence difference between intervention vs. control ( $P1-P0$ )

PR\* Measured prevalence ratio between intervention vs. control ( $P1^*/P0^*$ )

PD\* Measured prevalence difference between intervention vs. control ( $P1^*-P0^*$ )

x1 Probability of false negatives in intervention group

x0 Probability of false negatives in control group

y1 Probability of false positives in intervention group

y0 Probability of false positives in control group

$$P1^* = P1 - P1 x1 + (1-P1) y1$$

$$P0^* = P0 - P0 x0 + (1-P0) y0$$

### Assumptions under non-differential misclassification:

$$x1 = x0 = x$$

$$y1 = y0 = y$$

$$P1^* = P1 - P1 x + (1-P1) y$$

$$P0^* = P0 - P0 x + (1-P0) y$$

### Scenario 1: Imperfect sensitivity, perfect specificity ( $x > 0, y = 0$ )

$$PR^* = \frac{P1 - P1 x}{P0 - P0 x} = \frac{P1 (1 - x)}{P0 (1 - x)} = \frac{P1}{P0} = PR$$

$$PD^* = P1 - P1 x - (P0 - P0 x) = P1 (1 - x) - P0 (1 - x) = (1 - x) (P1 - P0) = (1 - x) PD$$

Scenario 2: Perfect sensitivity, imperfect specificity ( $x = 0, y > 0$ )

$$PR^* = \frac{P1 + (1 - P1) y}{P0 + (1 - P0) y} = \frac{P1 + y - P1 y}{P0 + y - P0 y} = \frac{P1(1 - y + y/P1)}{P0(1 - y + y/P0)} = \frac{P1}{P0} \cdot \frac{1 - y + y/P1}{1 - y + y/P0} = PR \cdot \frac{1 - y + y/P1}{1 - y + y/P0}$$

when  $P1 < P0, PR^* > PR$   
when  $P1 > P0, PR^* < PR$

$$PD^* = P1 + (1 - P1) y - [P0 + (1 - P0) y] = P1 + y - P1 y - (P0 + y - P0 y) = P1(1 - y) - P0(1 - y) = (1 - y)(P1 - P0) = (1 - y) PD$$

Scenario 3: Imperfect sensitivity, imperfect specificity ( $x > 0, y > 0$ )

$$PR^* = \frac{P1 - P1 x + (1 - P1) y}{P0 - P0 x + (1 - P0) y} = \frac{P1 - P1 x + y - P1 y}{P0 - P0 x + y - P0 y} = \frac{P1(1 - x - y + y/P1)}{P0(1 - x - y + y/P0)} = \frac{P1}{P0} \cdot \frac{1 - x - y + y/P1}{1 - x - y + y/P0} = PR \cdot \frac{1 - x - y + y/P1}{1 - x - y + y/P0}$$

when  $P1 < P0, PR^* > PR$   
when  $P1 > P0, PR^* < PR$

$$PD^* = P1 - P1 x + (1 - P1) y - [P0 - P0 x + (1 - P0) y] = P1 - P1 x + y - P1 y - (P0 - P0 x + y - P0 y) = P1(1 - x - y) - P0(1 - x - y) = (1 - x - y)(P1 - P0) = (1 - x - y) PD$$
