# Supplementary material for: Effects of water, sanitation, handwashing and nutritional interventions on soil-transmitted helminth infections in young children: A cluster-randomized controlled trial in rural Bangladesh
Source: PubMed Central journal article supplement (PMC6519840; doi:10.1371/journal.pntd.0007323), 2019-05-03
Supplement: pntd.0007323.s007.pdf [file pntd.0007323.s007.pdf]

Table S1: Enrollment characteristics of individuals with missing vs. observed outcomes

| No. of individuals                       | Missing<br>(N=2824) | Observed<br>(N=7187) |
|------------------------------------------|---------------------|----------------------|
| Index child, %                           | 49.3                | 53.3                 |
| <b>Maternal</b>                          |                     |                      |
| Age, mean                                | 23.1                | 24.3                 |
| Years of education, mean                 | 5.9                 | 5.7                  |
| <b>Paternal</b>                          |                     |                      |
| Years of education, mean                 | 4.9                 | 4.7                  |
| Works in agriculture, %                  | 28.0                | 33.1                 |
| <b>Household</b>                         |                     |                      |
| Number of persons, mean                  | 4.6                 | 4.8                  |
| Has electricity, %                       | 56.0                | 59.3                 |
| Has a cement floor, %                    | 12.2                | 9.6                  |
| Acres of agricultural land owned, mean   | 0.1                 | 0.1                  |
| <b>Drinking water</b>                    |                     |                      |
| Shallow tubewell primary water source, % | 72.0                | 74.0                 |
| Stored water observed at home, %         | 50.6                | 46.7                 |
| Reported treating water yesterday, %     | 0.0                 | 0.2                  |
| <b>Sanitation</b>                        |                     |                      |
| Daily defecating in the open, %          |                     |                      |
| Adult men                                | 7.6                 | 8.3                  |
| Adult women                              | 3.6                 | 4.9                  |
| Children: 8-<15 years                    | 9.1                 | 11.0                 |
| Children: 3-<8 years                     | 36.7                | 38.0                 |
| Children: 0-<3 years                     | 86.2                | 83.7                 |
| Latrine, %                               |                     |                      |
| Owned                                    | 51.7                | 51.5                 |
| Concrete slab                            | 94.2                | 93.4                 |
| Functional water seal                    | 30.5                | 28.6                 |
| Visible stool on slab or floor           | 49.3                | 48.2                 |
| Owned a potty, %                         | 5.7                 | 4.5                  |
| Human feces observed in, %               |                     |                      |
| House                                    | 7.8                 | 9.3                  |
| Child's play area                        | 1.3                 | 1.2                  |
| <b>Handwashing</b>                       |                     |                      |
| Has within 6 steps of latrine, %         |                     |                      |
| Has water                                | 14.0                | 11.0                 |
| Has soap                                 | 8.6                 | 5.6                  |
| Has within 6 steps of kitchen, %         |                     |                      |
| Has water                                | 9.1                 | 8.2                  |
| Has soap                                 | 2.4                 | 2.5                  |
