# Supplementary material for: Effects of water, sanitation, handwashing and nutritional interventions on soil-transmitted helminth infections in young children: A cluster-randomized controlled trial in rural Bangladesh
Source: PubMed Central journal article supplement (PMC6519840; doi:10.1371/journal.pntd.0007323), 2019-05-03
Supplement: pntd.0007323.s013.pdf [file pntd.0007323.s013.pdf]

Table S7: Moderate/heavy infection prevalence, combined nutrition plus WSH vs. WSH and nutrition interventions

| Arm              | N   | Prevalence | Prevalence ratio  |                       |                   | Prevalence difference |                       |                     |
|------------------|-----|------------|-------------------|-----------------------|-------------------|-----------------------|-----------------------|---------------------|
|                  |     |            | Unadjusted        | Adjusted <sup>a</sup> | IPCW <sup>b</sup> | Unadjusted            | Adjusted <sup>a</sup> | IPCW <sup>b</sup>   |
| <b>Ascaris</b>   |     |            |                   |                       |                   |                       |                       |                     |
| Nutrition + WSH  | 933 | 6.1%       |                   |                       |                   |                       |                       |                     |
| WSH              | 941 | 3.3%       | 1.85 (1.09, 3.16) | 2.02 (1.21, 3.39)     | 2.02 (1.18, 3.47) | 2.81 (0.40, 5.23)     | 3.15 (0.90, 5.41)     | 3.16 (0.77, 5.55)   |
| Nutrition        | 863 | 4.2%       | 1.46 (0.89, 2.42) | 1.42 (0.88, 2.29)     | 1.46 (0.87, 2.45) | 1.94 (-0.67, 4.55)    | 1.79 (-0.69, 4.26)    | 1.96 (-0.76, 4.68)  |
| <b>Hookworm</b>  |     |            |                   |                       |                   |                       |                       |                     |
| Nutrition + WSH  | 933 | 0.0%       |                   |                       |                   |                       |                       |                     |
| WSH              | 941 | 0.2%       | - <sup>c</sup>    | - <sup>c</sup>        | - <sup>c</sup>    | -0.21 (-0.50, 0.08)   | -0.26 (-0.52, 0.00)   | -0.22 (-0.54, 0.09) |
| Nutrition        | 863 | 0.3%       | - <sup>c</sup>    | - <sup>c</sup>        | - <sup>c</sup>    | -0.35 (-0.74, 0.05)   | -0.36 (-0.74, 0.02)   | -0.35 (-0.72, 0.03) |
| <b>Trichuris</b> |     |            |                   |                       |                   |                       |                       |                     |
| Nutrition + WSH  | 933 | 1.1%       |                   |                       |                   |                       |                       |                     |
| WSH              | 941 | 0.7%       | 1.44 (0.50, 4.17) | 1.39 (0.50, 3.86)     | 1.41 (0.54, 3.68) | 0.33 (-0.59, 1.25)    | 0.30 (-0.58, 1.18)    | 0.31 (-0.53, 1.15)  |
| Nutrition        | 863 | 0.5%       | 2.31 (0.95, 5.65) | 2.26 (0.94, 5.44)     | 2.27 (0.90, 5.72) | 0.61 (-0.08, 1.29)    | 0.59 (-0.07, 1.25)    | 0.60 (-0.13, 1.33)  |
| <b>Any STH</b>   |     |            |                   |                       |                   |                       |                       |                     |
| Nutrition + WSH  | 933 | 6.6%       |                   |                       |                   |                       |                       |                     |
| WSH              | 941 | 3.8%       | 1.74 (1.06, 2.84) | 1.88 (1.17, 3.01)     | 1.87 (1.14, 3.07) | 2.82 (0.30, 5.34)     | 3.17 (0.84, 5.51)     | 3.15 (0.66, 5.65)   |
| Nutrition        | 863 | 4.8%       | 1.40 (0.85, 2.29) | 1.33 (0.83, 2.11)     | 1.39 (0.85, 2.29) | 1.89 (-0.98, 4.77)    | 1.60 (-1.09, 4.29)    | 1.89 (-1.01, 4.80)  |

<sup>a</sup> Adjustment covariates considered include ID of the lab staff member who performed the Kato-Katz analysis, month of measurement, child age, sex and birth order since this information is not available for individuals lost to follow-up. An indicator variable distinguishing index vs. non-index child status was included as a proxy for age.

<sup>b</sup> Inverse probability of censoring weighting. Adjustment covariates considered include the variables above except for ID of the lab staff member who performed the Kato-Katz analysis, month of measurement, child age, sex and birth order since this information is not available for individuals lost to follow-up. An indicator variable distinguishing index vs. non-index child status was included as a proxy for age.

<sup>c</sup> Could not calculate due to sparse data.
